# Supplementary material for: Timescales of N–H bond dissociation in pyrrole: a nonadiabatic dynamics study
Source: Royal Society of Chemistry journal article supplement (doi:10.1039/c5cp02100f), 2015-01-01
Supplement: c5cp02100f2.tar [file c5cp02100f2.tar]

**Table 1** Comparison between ADC(2) excitation energies with different basis sets. Basis sets with additional diffuse functions are marked with a + sign.

| State              | aug-cc<br>-pVDZ | aug-cc<br>-pVDZ+ | cc<br>-pVTZ+ | aug-cc<br>-pVTZ | aug-cc<br>-pVTZ+ | aug-cc<br>-pVQZ | def2-<br>TZVPD |
|--------------------|-----------------|------------------|--------------|-----------------|------------------|-----------------|----------------|
| $A_2(\pi\sigma^*)$ | 5.13            | 5.10             | 5.33         | 5.30            | 5.29             | 5.37            | 5.61           |
|                    | 0.000           | 0.000            | 0.000        | 0.000           | 0.000            | 0.000           | 0.000          |
| $B_1(\pi\sigma^*)$ | 5.75            | 5.72             | 5.95         | 5.95            | 5.93             | 6.01            | 6.27           |
|                    | 0.013           | 0.008            | 0.016        | 0.008           | 0.009            | 0.009           | 0.004          |
| $A_2(\pi Ryd)$     | 5.86            | 5.78             | 5.99         | 6.03            | 5.99             | 6.09            | 6.50           |
|                    | 0.000           | 0.000            | 0.000        | 0.000           | 0.000            | 0.000           | 0.000          |
| $B_1(\pi Ryd)$     | 5.89            | 5.82             | 6.03         | 6.07            | 6.04             | 6.13            | 6.54           |
|                    | 0.031           | 0.027            | 0.020        | 0.034           | 0.027            | 0.031           | 0.055          |
| $B_2(\pi\pi^*)$    | 6.35            | 5.93             | 6.16         | 6.36            | 6.11             | 6.34            | 6.75           |
|                    | 0.214           | 0.072            | 0.064        | 0.20            | 0.095            | 0.18            | 0.202          |
| $A_1(\pi\pi^*)$    | 6.49            | /                | 6.63         | 6.47            | 6.47             | 6.47            | /              |
|                    | 0.000           | /                | 0.004        | 0.002           | 0.002            | 0.003           | /              |

**Table 2** Comparison between TDDFT excitation energies with different basis sets. Basis sets with additional diffuse functions are marked with a + sign.

| State              | def2-<br>TZVPD | def2-<br>QZVPPD | cc-<br>pVTZ+ | aug-cc-<br>pVTZ | def2-<br>QZVP(-f,-g) |
|--------------------|----------------|-----------------|--------------|-----------------|----------------------|
| $A_2(\pi\sigma^*)$ | 4.99           | 4.86            | 4.69         | 4.68            | 5.22                 |
|                    | 0.000          | 0.000           | 0.000        | 0.000           | 0.000                |
| $B_1(\pi\sigma^*)$ | 5.87           | 5.73            | 5.38         | 5.46            | 6.06                 |
|                    | 0.013          | 0.022           | 0.026        | 0.026           | 0.000                |
| $A_2(\pi Ryd)$     | 5.89           | 5.76            | 5.37         | 5.44            | 6.44                 |
|                    | 0.000          | 0.000           | 0.000        | 0.000           | 0.000                |
| $B_1(\pi Ryd)$     | 5.95           | 5.80            | 5.59         | 5.60            | 6.51                 |
|                    | 0.026          | 0.013           | 0.003        | 0.012           | 0.030                |
| $B_2(\pi\pi^*)$    | 6.32           | 6.26            | 5.61         | 5.89            | 6.31                 |
|                    | 0.174          | 0.186           | 0.061        | 0.153           | 0.173                |
| $A_1(\pi\pi^*)$    | 6.47           | 6.45            | 6.24         | 6.39            | 6.48                 |
|                    | 0.001          | 0.000           | 0.025        | 0.009           | 0.001                |

**Table 3** Exponents (multiplied by  $10^3$ ) and coefficients of the diffuse functions added to the basis sets marked with a + sign.

| s         |              | p         |              | d         |              |
|-----------|--------------|-----------|--------------|-----------|--------------|
| Exponents | Coefficients | Exponents | Coefficients | Exponents | Coefficients |
| 5.85838   | 3.57009      | 9.98821   | 1.83410      | 14.20440  | 1.50054      |
| 3.34597   | -7.03242     | 5.68936   | -2.60999     | 8.07659   | -1.97912     |
| 2.04842   | 9.06092      | 3.47568   | 4.65587      | 4.92719   | 3.88517      |
| 1.32364   | -6.42858     | 2.24206   | -6.53099     | 3.17481   | -5.39074     |
| 0.89310   | -0.41753     | 1.51064   | 7.16231      | 2.13712   | 6.08170      |
| 0.62431   | 5.70765      | 1.05475   | -5.65978     | 1.49102   | -4.99771     |
| 0.44950   | -5.00403     | 0.75866   | 2.81845      | 1.07174   | 2.61858      |
| 0.33184   | 1.52601      | 0.55958   | -0.65406     | 0.79007   | -0.64550     |

**Table 4** Vibrational normal modes calculated at the MP2/aug-cc-pVTZ level along with the corresponding wavenumbers and Boltzmann factors (BF).

| Mode | Symmetry | Wavenumber ( $cm^{-1}$ ) | BF (100K) | BF (293K) |
|------|----------|--------------------------|-----------|-----------|
| 1    | $b_1$    | 520                      | 0.640     | 0.249     |
| 2    | $a_2$    | 623                      | 0.147     | 0.150     |
| 3    | $b_1$    | 648                      | 0.101     | 0.132     |
| 4    | $a_2$    | 685                      | 0.060     | 0.111     |
| 5    | $b_1$    | 731                      | 0.031     | 0.088     |
| 6    | $b_1$    | 830                      | 0.007     | 0.054     |
| 7    | $b_2$    | 871                      | 0.004     | 0.045     |
| 8    | $a_2$    | 872                      | 0.004     | 0.044     |
| 9    | $a_1$    | 891                      | 0.003     | 0.040     |
| 10   | $a_1$    | 1043                     |           | 0.019     |
| 11   | $b_2$    | 1065                     |           | 0.017     |
| 12   | $a_1$    | 1104                     |           | 0.014     |
| 13   | $b_2$    | 1170                     |           | 0.010     |
| 14   | $a_1$    | 1176                     |           | 0.010     |
| 15   | $b_2$    | 1313                     |           | 0.005     |
| 16   | $a_1$    | 1434                     |           | 0.003     |
| 17   | $b_2$    | 1483                     |           | 0.002     |
| 18   | $a_1$    | 1505                     |           | 0.002     |
| 19   | $b_2$    | 1558                     |           | 0.002     |
| 20   | $b_2$    | 3274                     |           |           |
| 21   | $a_1$    | 3285                     |           |           |
| 22   | $b_2$    | 3299                     |           |           |
| 23   | $a_1$    | 3305                     |           |           |
| 24   | $a_1$    | 3691                     |           |           |

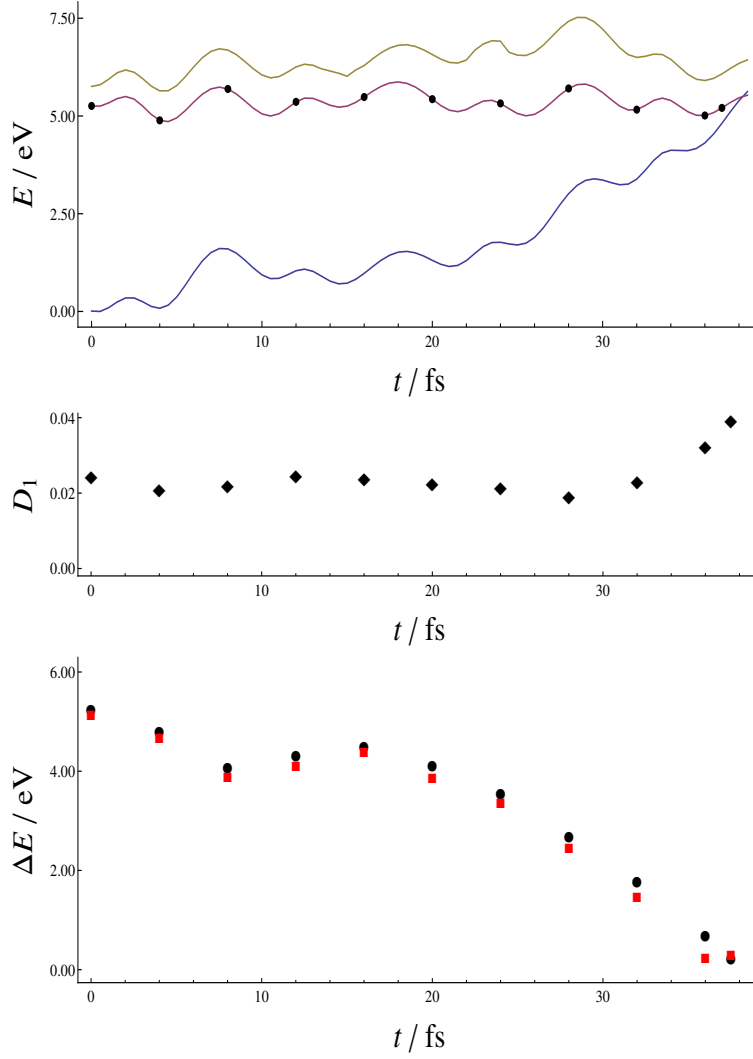

**Figure 1** Characteristic trajectory for the dynamics initiated in the  $A_2(\pi\sigma^*)$  state at the ADC(2)/aug-cc-pVDZ level. (Top) Potential energies of the ground and first two excited states along the trajectory (lines), and geometries for which further analysis was performed (black circles). (Middle) The  $D_1$  diagnostic of the ground state at selected geometries along the trajectory. (Bottom) Excitation energies of the current electronic state at the ADC(2)/aug-cc-pVDZ (black circles) and CASPT2/aug-cc-pVDZ (red squares) levels.

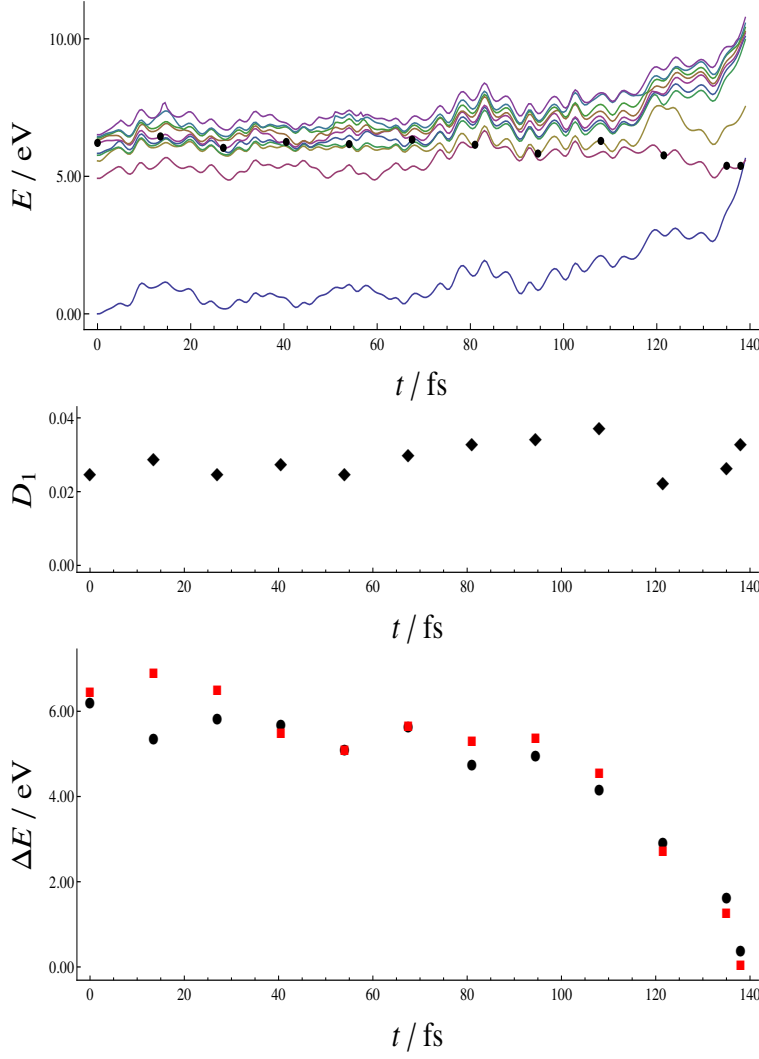

**Figure 2** Representative trajectory for the dynamics from the  $B_2(\pi\pi^*)$  state at the ADC(2)/aug-cc-pVDZ level. (Top) The energies of the ground and first nine excited states along the trajectory (lines). Geometries for which further analysis was performed are indicated by black circles. (Middle) The  $D_1$  diagnostic of the ground state at selected geometries along the trajectory. (Bottom) Excitation energies of the current electronic state during the dynamics at the ADC(2)/aug-cc-pVDZ (black circles) and CASPT2/aug-cc-pVDZ (red squares) levels.

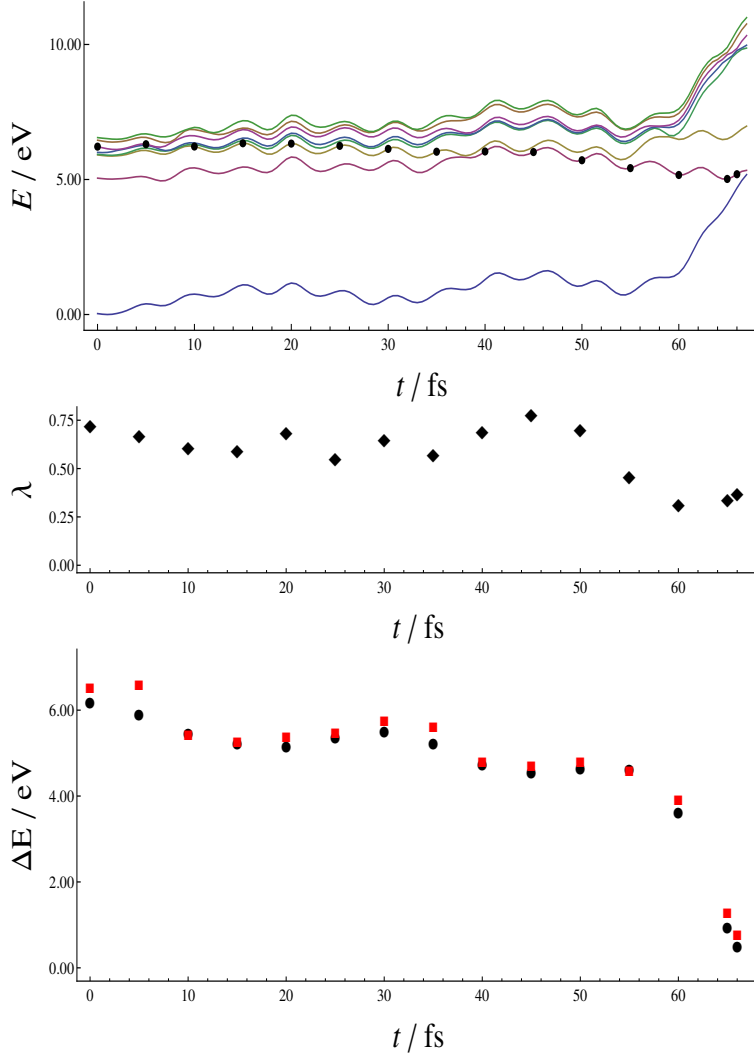

**Figure 3** Representative trajectory for the dynamics from the  $B_2(\pi\pi^*)$  state at the TD-B3LYP/def2-TZVPD level. (Top) The energies of the ground and first seven excited states along the trajectory (lines), and geometries for which further analysis was performed (black circles). (Middle) The  $\lambda$  diagnostic of the current state at selected geometries along the trajectory. (Bottom) Excitation energies of the current electronic state during the dynamics at the TD-B3LYP (black circles) and CASPT2 (red squares) levels.
