# Supplementary figures and images for: Timescales of N–H bond dissociation in pyrrole: a nonadiabatic dynamics study
Source: Royal Society of Chemistry journal article supplement (doi:10.1039/c5cp02100f), 2015-01-01

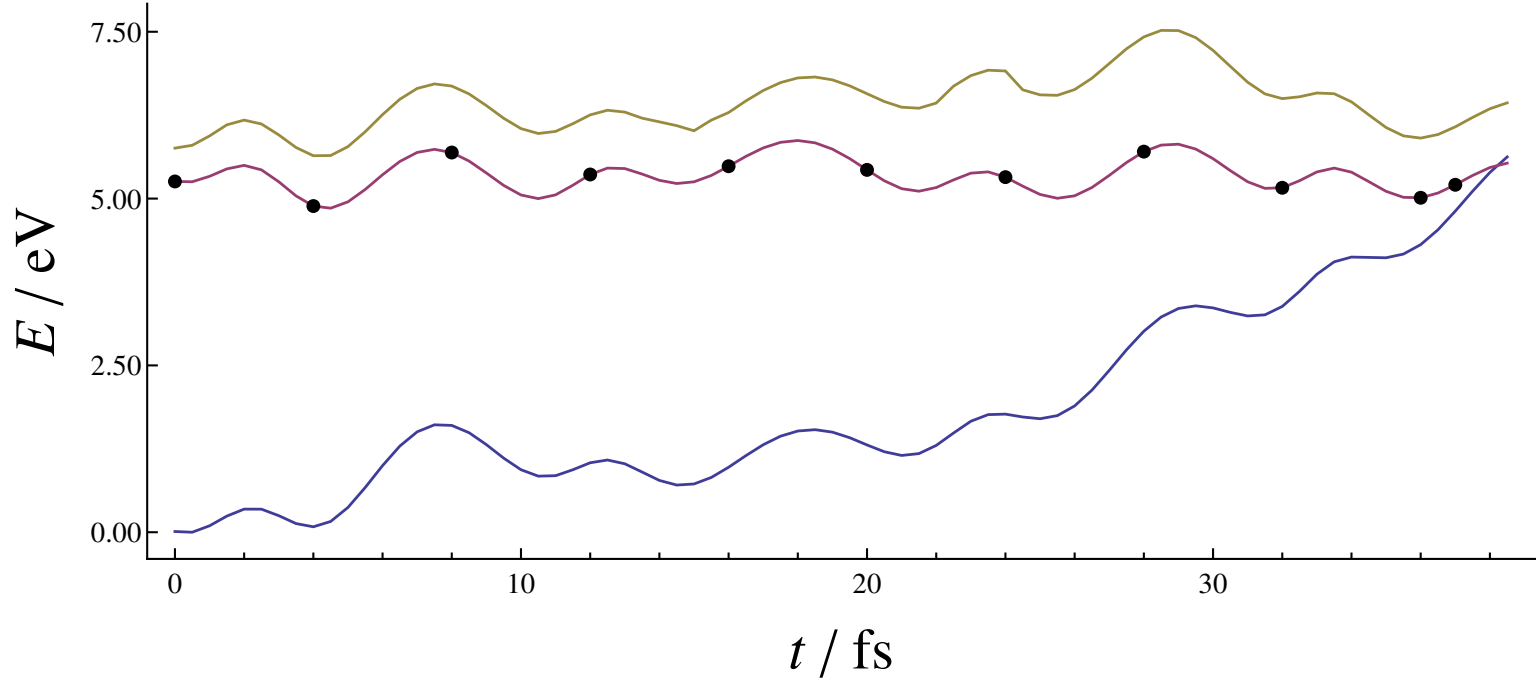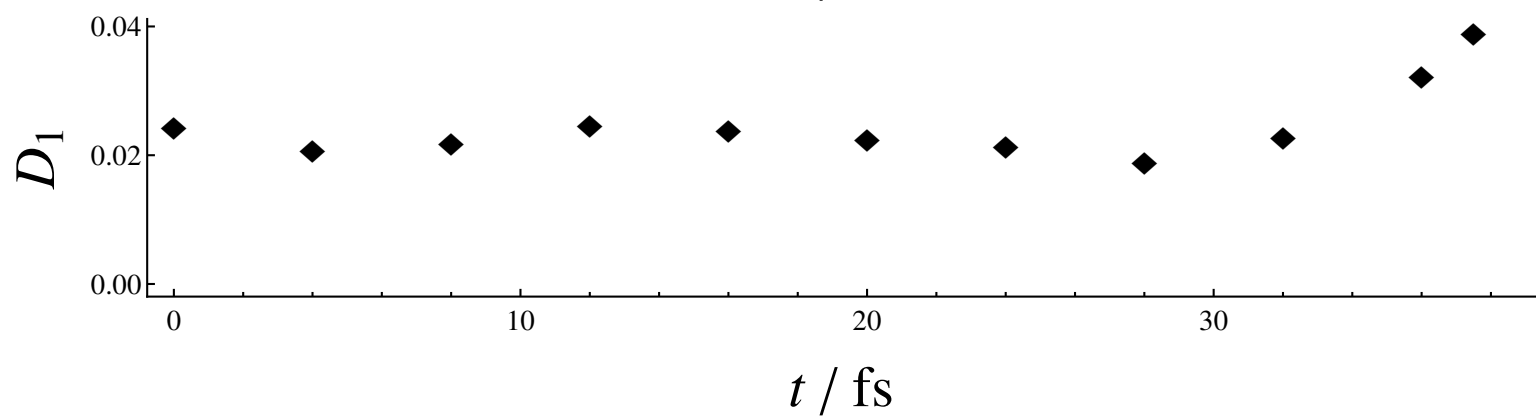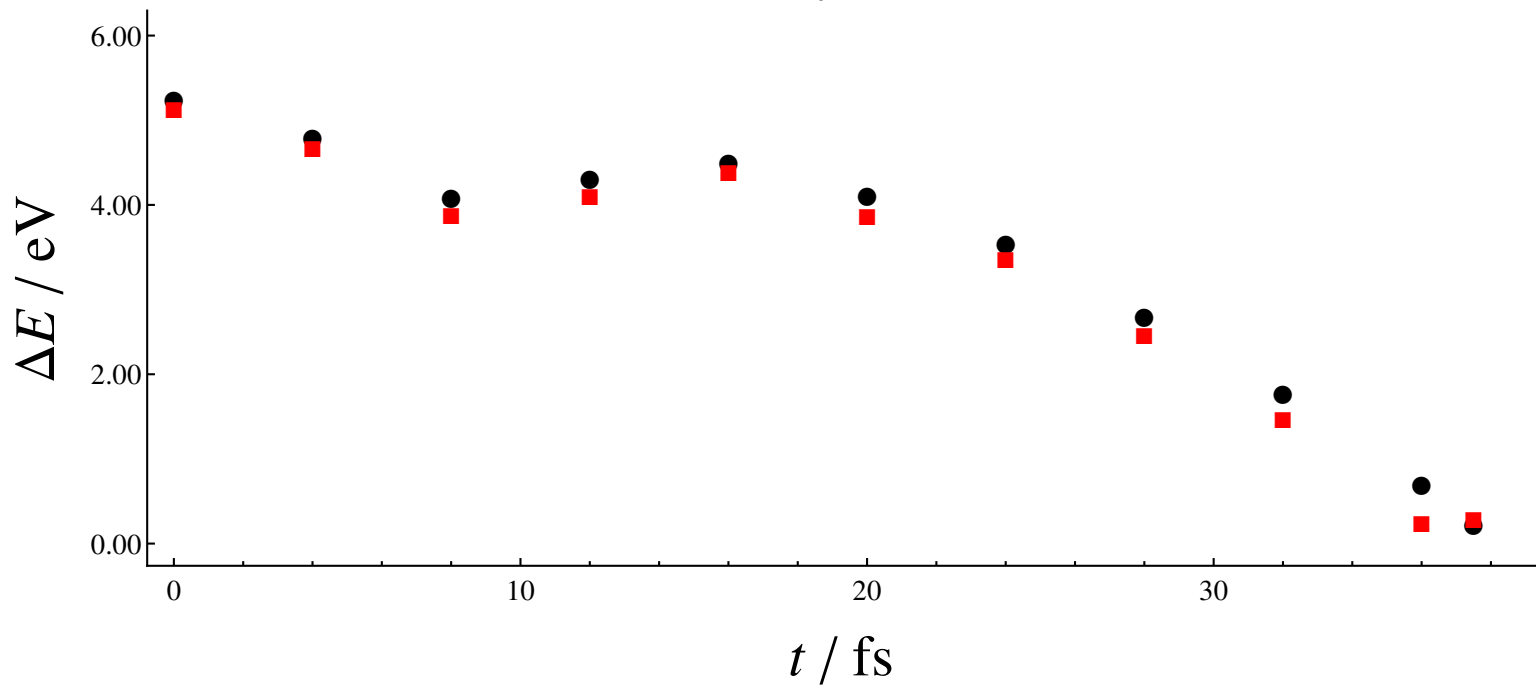

Supplement: c5cp02100f2.tar [file c5cp02100f2.tar]

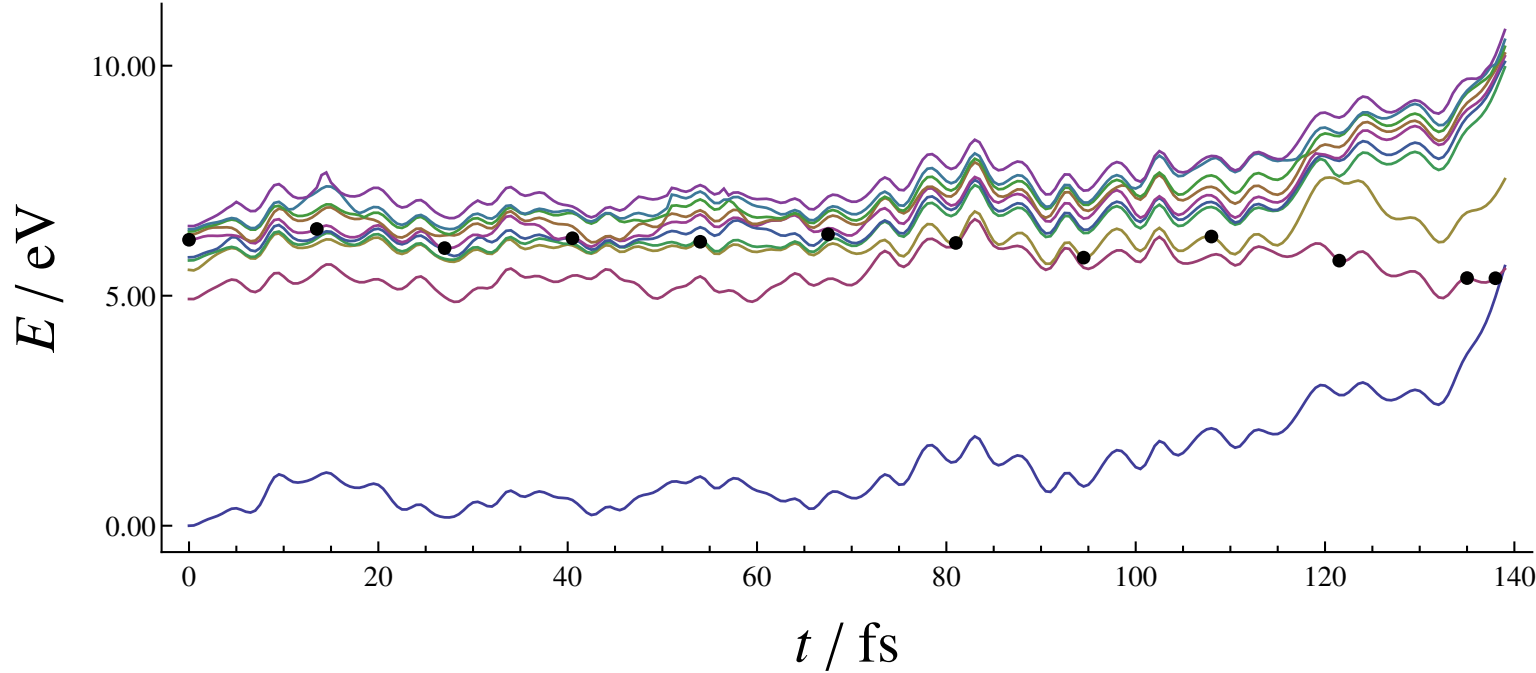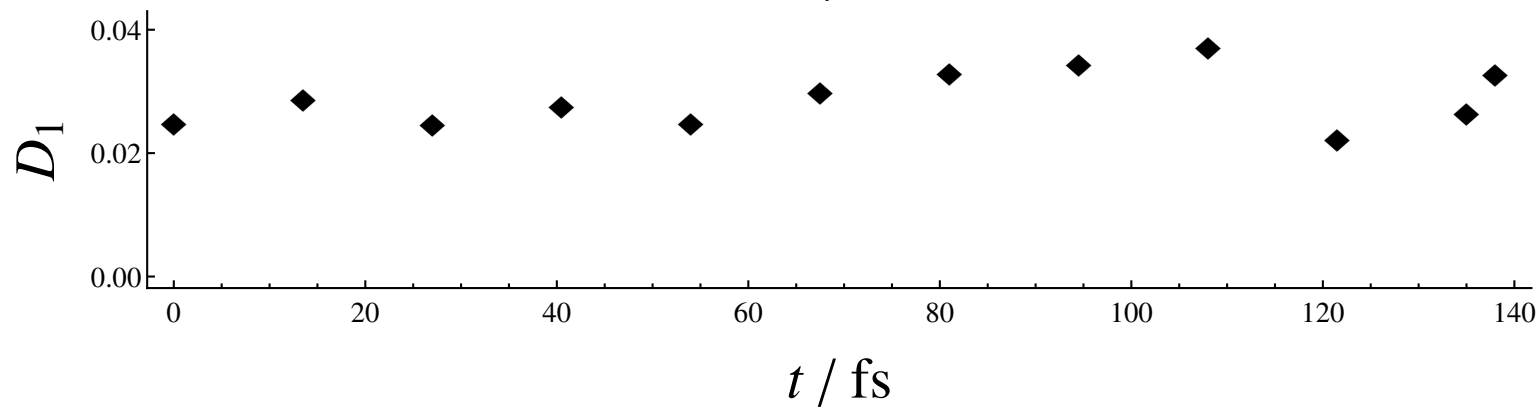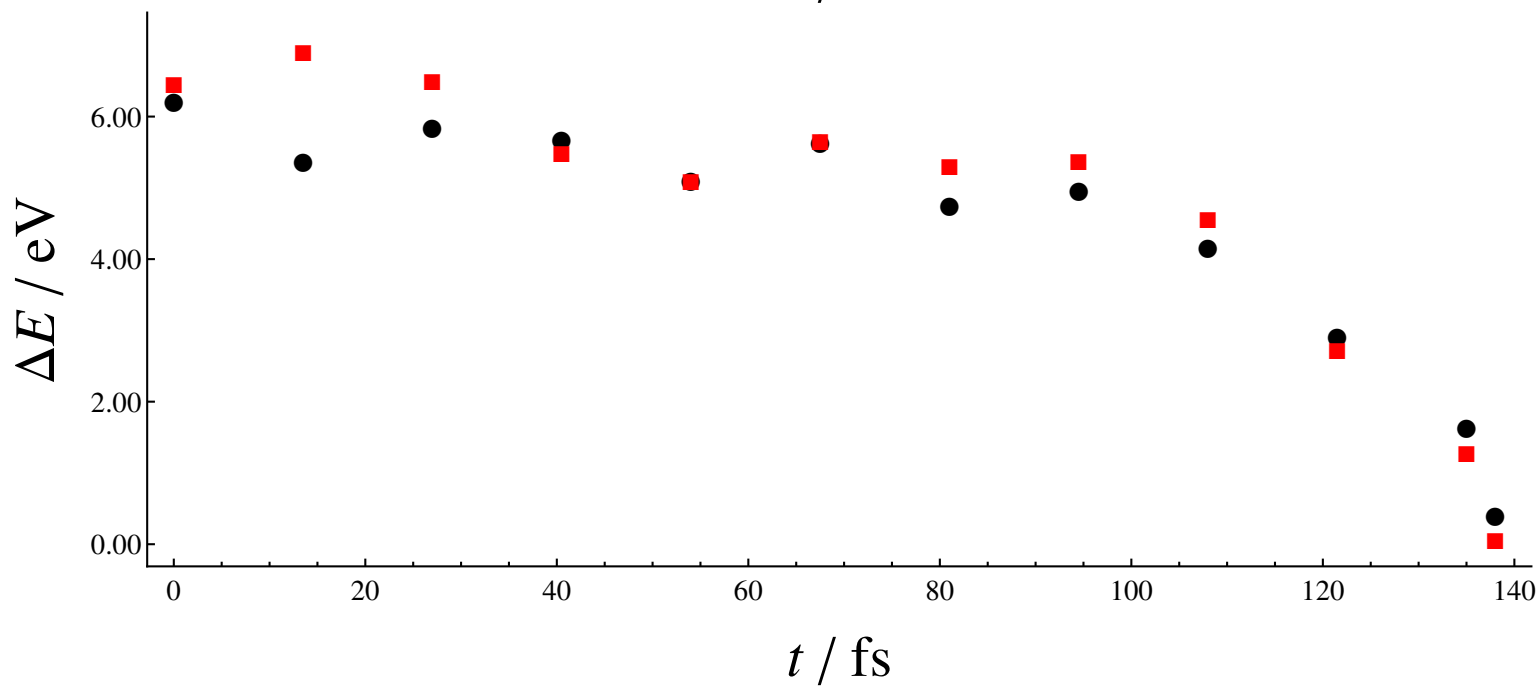

Supplement: c5cp02100f2.tar [file c5cp02100f2.tar]

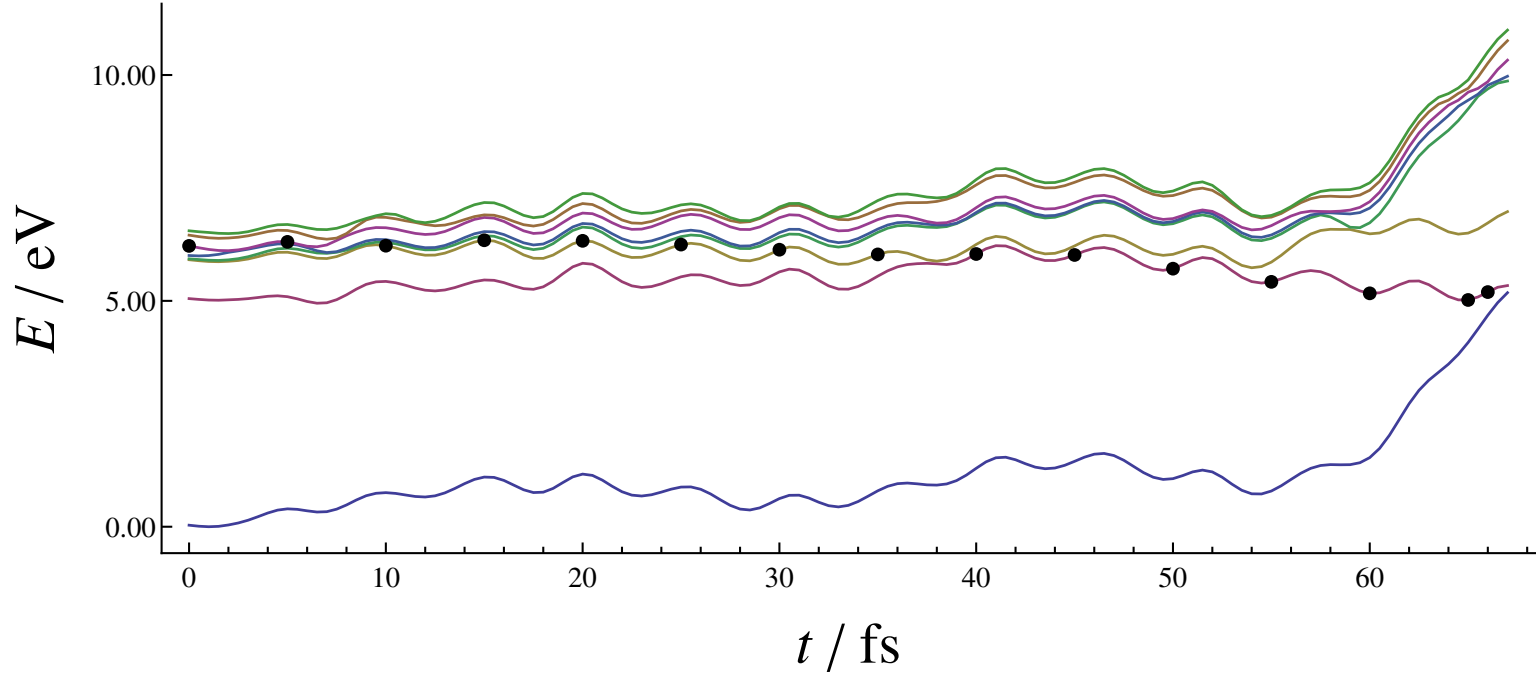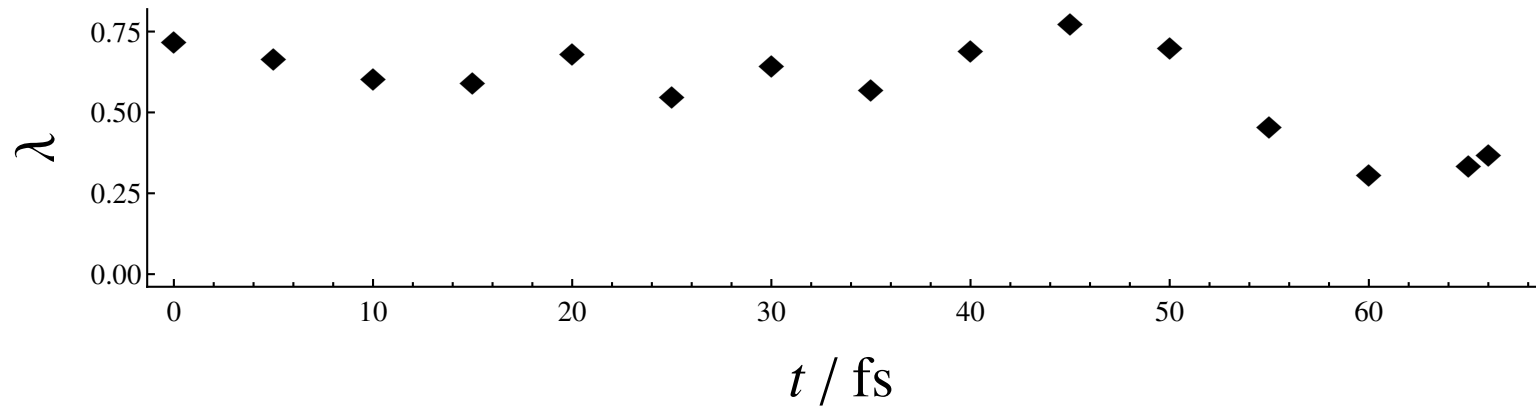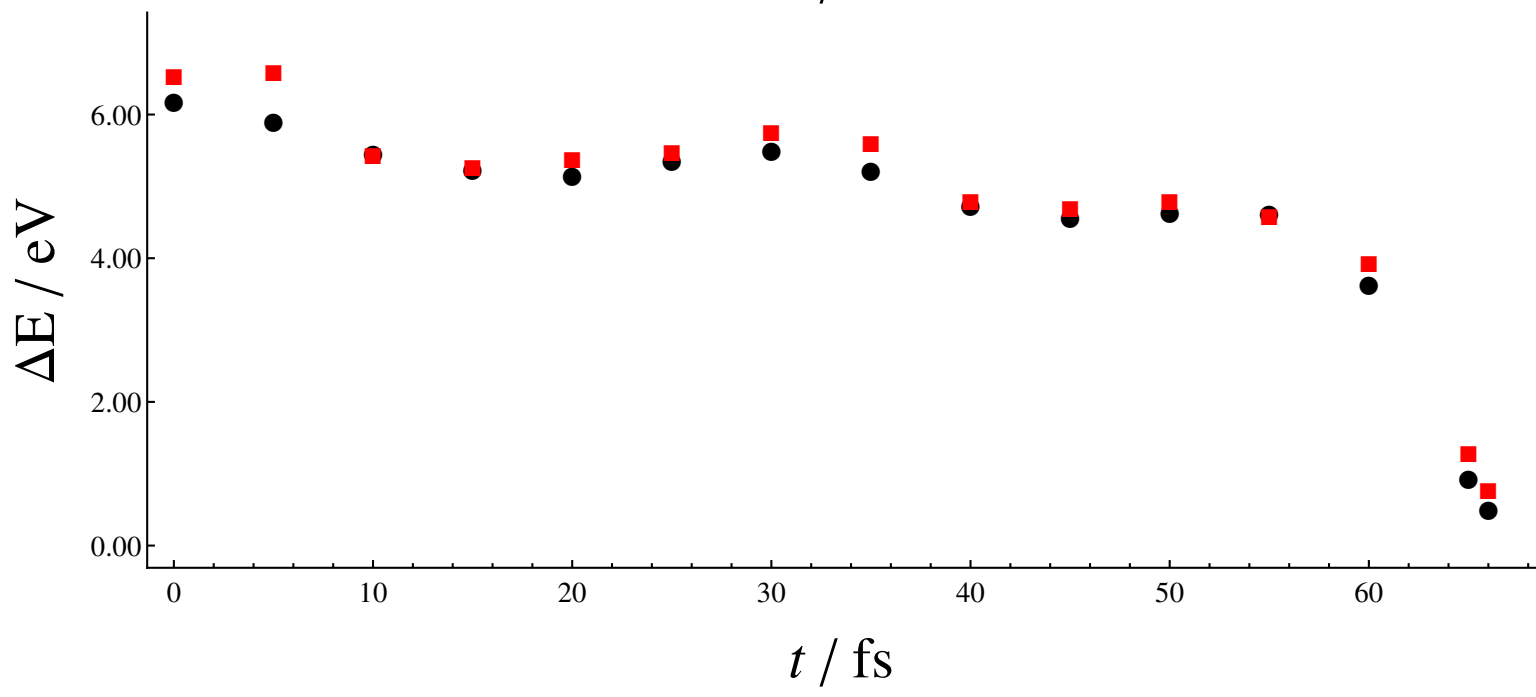

Supplement: c5cp02100f2.tar [file c5cp02100f2.tar]

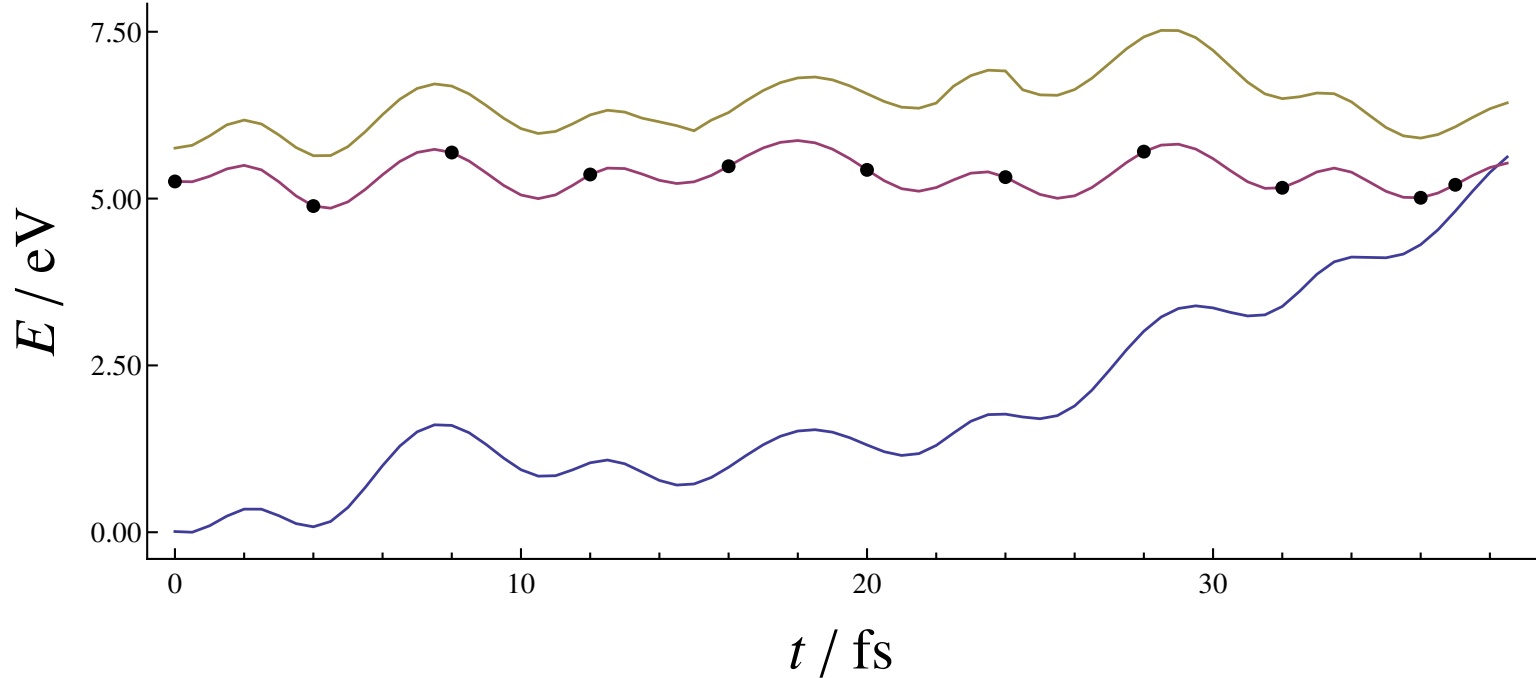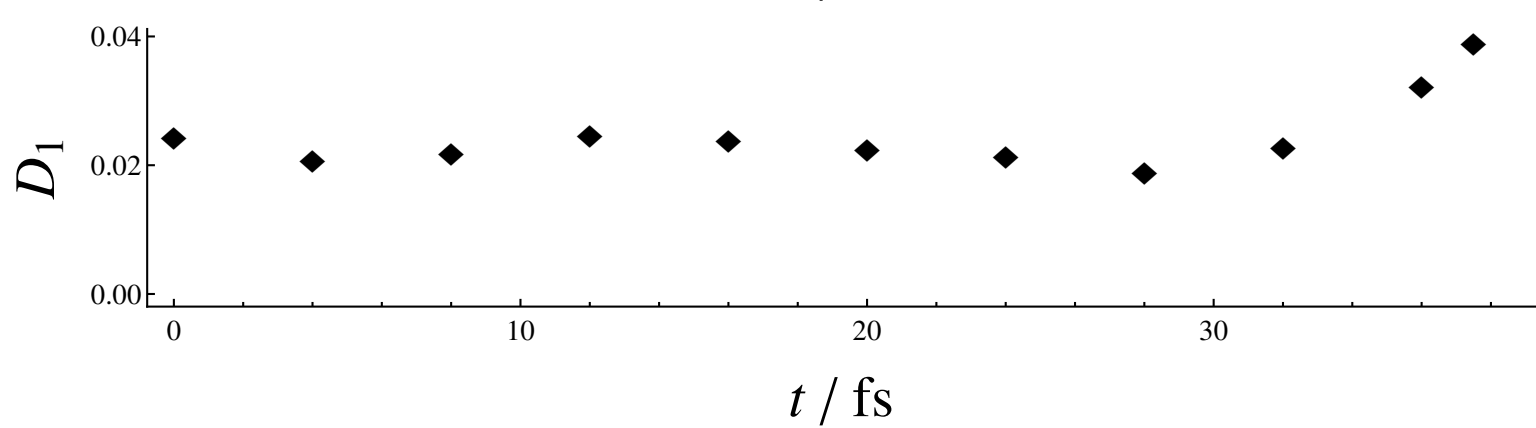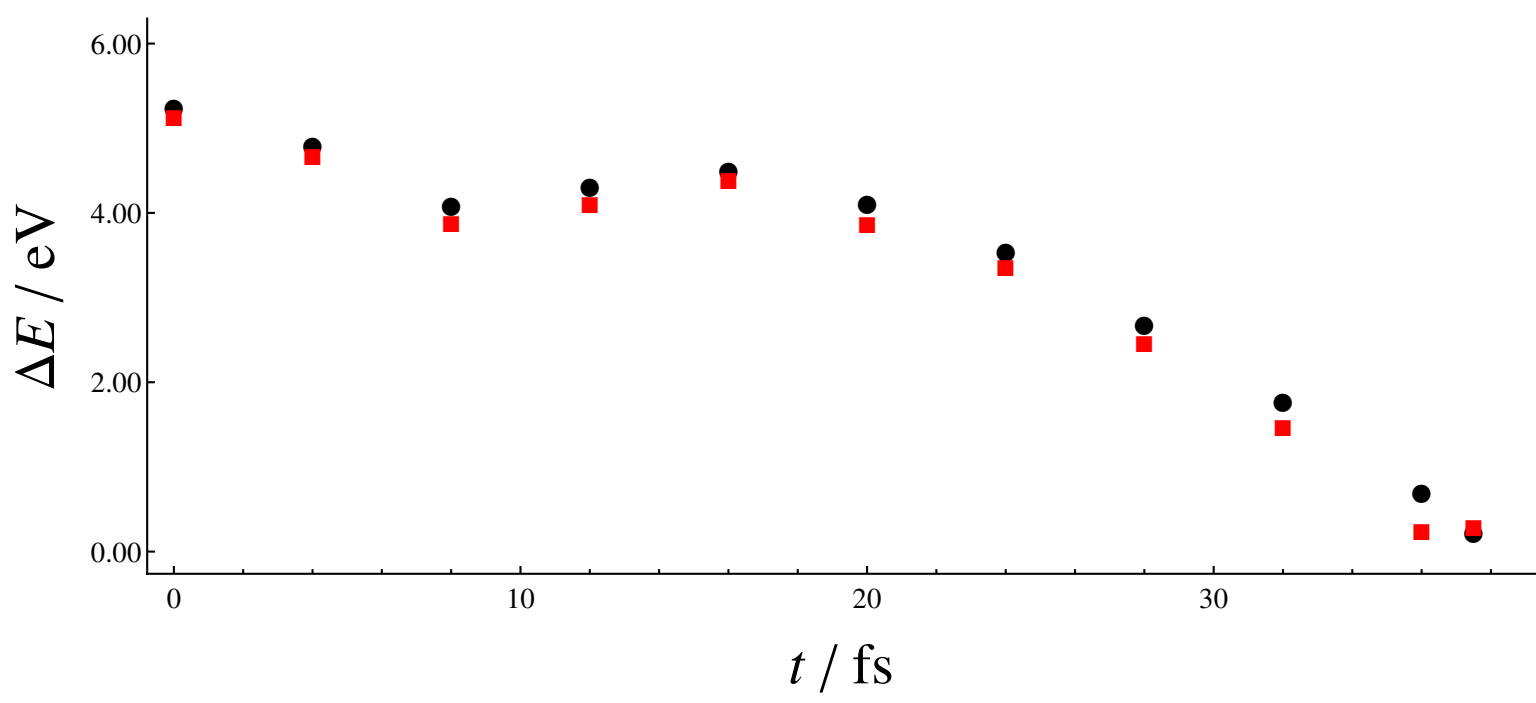

Supplement: c5cp02100f2.tar [file c5cp02100f2.tar]
